# Supplementary material
Source: HighWire-hosted journal article supplement (https://bjsm.bmj.com/content/57/13/855)
Supplement: inline-supplementary-material-3 [file inline-supplementary-material-3.pdf]

## Appendix 3. Measures used for outcomes presented

| Paper                              | Measure used                                                                                                |
|------------------------------------|-------------------------------------------------------------------------------------------------------------|
| <b>Return to Sport</b>             |                                                                                                             |
| Ardern et al, 2015*                | Are you currently playing sport at the same level that you played pre-injury?                               |
| Ebert and Annear, 2019*            | Tegner activity scale – Pre-injury level                                                                    |
| Faleide et al, 2021                | At what level do you perform your main sport/activity now? (pre-injury)                                     |
| Kitaguchi et al, 2020              | Tegner activity scale – Pre-injury level                                                                    |
| McGrath et al, 2017*               | Tegner activity scale – Pre-injury level                                                                    |
| Moksnes and Risberg, 2009*         | IKDC - pre-injury activity level                                                                            |
| Nawasreh et al, 2017*              | Global Rating scale – pre-injury level                                                                      |
| Toole et al, 2017*                 | Tegner activity scale – maintain or improve                                                                 |
| Webster et al, 2019*               | Marx Scale – Pre-injury level                                                                               |
| Welling et al, 2020*               | Did you return to the pre-injury level of sport?                                                            |
| <b>Symptoms and function</b>       |                                                                                                             |
| Cristiani et al, 2020*             | KOOS – Meeting Englund criteria                                                                             |
| Culvenor et al, 2016*              | KOOS – Meeting Englund criteria                                                                             |
| Ebert and Annear, 2019*            | IKDC – PASS (>75.9)                                                                                         |
| Ericsson et al, 2013*              | KOOS – Meeting Englund criteria                                                                             |
| Filbay et al, 2021*                | KOOS – Meeting Englund criteria                                                                             |
| Logerstedt et al, 2012*            | IKDC – Below 15th percentile                                                                                |
| Mansson et al, 2013*               | KOOS – Meeting Englund criteria                                                                             |
| Oiestad et al, 2012*               | KOOS – Meeting Englund criteria                                                                             |
| Stropnik et al, 2020               | IKDC – Below 15th percentile                                                                                |
| Welling et al, 2020*               | IKDC – PASS (>75.9)                                                                                         |
| <b>Success with ACL deficiency</b> |                                                                                                             |
| Button et al, 2006*                | Return to pre-injury activity level (phone questionnaire)                                                   |
| Eitzen et al, 2010                 | Not having delayed ACLR up to 15/12 post-injury                                                             |
| Ekas et al, 2019                   | Not having delayed ACLR up to 8-years post-injury                                                           |
| Ericsson et al, 2013*              | Not having delayed ACLR up to 5-years post-injury                                                           |
| Fitzgerald et al, 2000             | Ability to return to preinjury levels of activity without experiencing an episode of giving-way at the knee |
| Grindem et al, 2018*               | Delayed ACLR up to 2-years post-injury                                                                      |
| <b>Subsequent knee injury</b>      |                                                                                                             |

|                            |                                                                                                                                               |
|----------------------------|-----------------------------------------------------------------------------------------------------------------------------------------------|
| Beischer et al, 2020       | ACL R re-rupture or contralateral injury up to 46-months post-surgery                                                                         |
| Cristiani et al, 2021      | Revision ACLR within 2-years post-ACLR                                                                                                        |
| Faleide et al, 2021        | ACL R re-rupture or contralateral ACL rupture up to 2-years post-surgery                                                                      |
| Faltstrom et al, 2021      | ACL R re-rupture, contralateral re-rupture or "severe" injury (absence from soccer play $\geq$ 28 days) up to 2-years post-surgery            |
| Grindem et al, 2016*       | ACL R re-rupture and other injuries to ACLR knee or contralateral rupture/injury up to 2-years post-surgery                                   |
| King et al, 2021           | Contralateral ACL injury within 2-years post-ACLR                                                                                             |
| Kyritsis et al, 2016*      | ACL graft re-rupture up to 2.5 years after surgery                                                                                            |
| Nawasreh et al, 2016       | ACL R re-rupture or contralateral injury up to 2-years post-surgery                                                                           |
| Sousa et al, 2017          | ACL R re-rupture or contralateral injury 4-years post-surgery                                                                                 |
| van Melick et al, 2021*    | ACL R re-rupture or contralateral ACL injury up to 2-years post-surgery                                                                       |
| Webster et al, 2019        | ACL R re-rupture or contralateral ACL injury up to 5-years post-surgery                                                                       |
| Wellsandt et al, 2017*     | ACL R re-rupture or contralateral injury $\geq$ 2-years post-surgery                                                                          |
| <b>Knee Osteoarthritis</b> |                                                                                                                                               |
| Filbay et al, 2021*        | Kellgren & Lawrence OA grading $\geq$ 2 and defined symptoms                                                                                  |
| Janssen et al, 2013*       | A combination of Ahlbäck grade 1 and Kellgren & Lawrence (K&L) grade 3 was defined as 'radiographic signs of knee OA'                         |
| Oiestad et al, 2012*       | Kellgren & Lawrence OA grading score $\geq$ 2 (Extra data received from author for this analysis)                                             |
| Patterson et al, 2018*     | OARSI criteria; i) JSN of grade 2 or higher, ii) Sum of osteophyte grades $\geq$ 2, iii) Grade 1 JSN in combination with a grade 1 osteophyte |
| Pinczewski et al, 2007*    | IKDC OA grading                                                                                                                               |
| Wellsandt et al, 2018*     | Kellgren & Lawrence OA grading $\geq$ 2                                                                                                       |

**Studies not included in meta-analysis**

|                          |                            |
|--------------------------|----------------------------|
| Flosadottir et al, 2016  | Tegner activity scale      |
| Flossadottir et al, 2018 | Knee – self efficacy scale |
| Kline et al, 2016        | Biomechanical variables    |

KOOS, The Knee Injury and Osteoarthritis Outcome Score, IKDC, International Knee Documentation Committee score, ACLR, anterior cruciate ligament reconstruction, OA, osteoarthritis, JSN, joint space narrowing,

\*Extra data received from author to report outcomes in this format for our analysis
