# Supplementary material
Source: HighWire-hosted journal article supplement (https://bjsm.bmj.com/content/57/13/855)
Supplement: inline-supplementary-material-5 [file inline-supplementary-material-5.pdf]

## Appendix 5. Risk of bias using a Modified Newcastle Ottawa Scale

| Article                                       | Selection bias                       |                   |                                           |             | Exposure bias                                       |                                                                 | Comparability bias                                              | Outcome bias                         |                        |                       |
|-----------------------------------------------|--------------------------------------|-------------------|-------------------------------------------|-------------|-----------------------------------------------------|-----------------------------------------------------------------|-----------------------------------------------------------------|--------------------------------------|------------------------|-----------------------|
|                                               | Definition of ACL injured population | Source population | Typical of average ACL injured population | Sample Size | How performance using a functional test was decided | Demonstrates outcome was not present at time of functional test | Comparability of cohorts on the basis of the design or analysis | Validity and reliability of outcomes | Assessment of outcome* | Adequacy of follow up |
| <i>Return to Sport</i>                        |                                      |                   |                                           |             |                                                     |                                                                 |                                                                 |                                      |                        |                       |
| Ardern et al, 2015                            | Low                                  | Low               | Low                                       | High        | Low                                                 | Low                                                             | High                                                            | High                                 | Low                    | High                  |
| Ebert et al, 2019                             | Low                                  | High              | High                                      | High        | High                                                | Low                                                             | High                                                            | Low                                  | Low                    | High                  |
| Faleide et al, 2019                           | Low                                  | Low               | Low                                       | High        | High                                                | Low                                                             | Low                                                             | High                                 | Low                    | High                  |
| Kitaguchi et al, 2020                         | Low                                  | Low               | Low                                       | High        | Low                                                 | Low                                                             | High                                                            | High                                 | Low                    | High                  |
| McGrath 2017                                  | Low                                  | High              | High                                      | Low         | Low                                                 | Low                                                             | Low                                                             | Low                                  | Low                    | High                  |
| Moksnes et al, 2009                           | Low                                  | Low               | Low                                       | High        | Low                                                 | Low                                                             | High                                                            | Low                                  | Low                    | High                  |
| Nawasreh et al, 2017                          | Low                                  | High              | Low                                       | High        | High                                                | High                                                            | Low                                                             | High                                 | High                   | High                  |
| Toole et al, 2017                             | Low                                  | High              | Low                                       | High        | High                                                | Low                                                             | High                                                            | Low                                  | Low                    | Low                   |
| Webster et al, 2019                           | Low                                  | Low               | Low                                       | High        | High                                                | Low                                                             | High                                                            | Low                                  | Low                    | High                  |
| Welling et al, 2020                           | Low                                  | Low               | Low                                       | High        | High                                                | High                                                            | High                                                            | High                                 | Low                    | High                  |
| <i>Patient-reported symptoms and function</i> |                                      |                   |                                           |             |                                                     |                                                                 |                                                                 |                                      |                        |                       |
| Cristiani et al, 2020                         | Low                                  | Low               | Low                                       | Low         | High                                                | High                                                            | Low                                                             | Low                                  | Low                    | High                  |
| Culvenor et al, 2016                          | Low                                  | Low               | Low                                       | High        | High                                                | Low                                                             | Low                                                             | Low                                  | Low                    | Low                   |
| Ericsson et al, 2013                          | Low                                  | Low               | Low                                       | High        | Low                                                 | Low                                                             | Low                                                             | Low                                  | Low                    | High                  |
| Filbay et al, 2021                            | Low                                  | Low               | Low                                       | Low         | High                                                | Low                                                             | Low                                                             | Low                                  | Low                    | High                  |
| Logerstedt et al, 2012                        | Low                                  | Low               | Low                                       | High        | Low                                                 | Low                                                             | High                                                            | Low                                  | Low                    | High                  |
| Mansson et al, 2013                           | Low                                  | High              | Low                                       | High        | High                                                | High                                                            | High                                                            | Low                                  | Low                    | High                  |
| Oiestad et al, 2012                           | Low                                  | High              | Low                                       | High        | High                                                | High                                                            | Low                                                             | Low                                  | Low                    | High                  |

|                                          |     |      |      |      |      |      |      |      |      |      |
|------------------------------------------|-----|------|------|------|------|------|------|------|------|------|
| Stropnik et al, 2020                     | Low | Low  | Low  | High | High | Low  | High | Low  | Low  | Low  |
| <i>Success with ACL deficiency</i>       |     |      |      |      |      |      |      |      |      |      |
| Button et al, 2006                       | Low | High | Low  | High | High | Low  | High | High | Low  | High |
| Eitzen et al, 2010                       | Low | Low  | Low  | High | Low  | Low  | High | High | High | Low  |
| Ekas et al, 2019                         | Low | Low  | High | High | High | Low  | High | Low  | Low  | Low  |
| Fitzgerald et al, 2000                   | Low | Low  | Low  | High | High | Low  | High | High | High | Low  |
| Grindem et al, 2018                      | Low | Low  | Low  | High | High | Low  | Low  | Low  | High | Low  |
| <i>Subsequent knee injury after ACLR</i> |     |      |      |      |      |      |      |      |      |      |
| Beischer et al, 2020                     | Low | Low  | Low  | High | Low  | Low  | High | High | High | High |
| Cristiani et al, 2021                    | Low | Low  | Low  | High | Low  | Low  | Low  | Low  | Low  | High |
| Faltstrom et al, 2021                    | Low | High | High | High | Low  | Low  | Low  | Low  | High | Low  |
| Grindem et al, 2016                      | Low | Low  | Low  | High | High | Low  | Low  | Low  | Low  | High |
| King et al, 2021                         | Low | Low  | High | High | High | Low  | Low  | Low  | High | High |
| Kyritsis et al, 2016                     | Low | Low  | High | High | High | Low  | Low  | High | High | Low  |
| Nawasreh et al, 2016                     | Low | High | Low  | High | High | Low  | High | High | High | High |
| Sousa et al, 2017                        | Low | Low  | Low  | Low  | High | Low  | High | High | High | High |
| van Melick et al, 2021                   | Low | Low  | Low  | High | Low  | Low  | High | High | Low  | High |
| Webster et al, 2019                      | Low | Low  | Low  | High | Low  | Low  | High | High | Low  | High |
| Wellsandt et al, 2017                    | Low | High | Low  | High | High | Low  | High | High | High | High |
| <i>Knee Osteoarthritis</i>               |     |      |      |      |      |      |      |      |      |      |
| Filbay et al, 2021                       | Low | Low  | Low  | High | High | High | Low  | Low  | Low  | High |
| Janssen et al, 2013                      | Low | Low  | Low  | High | Low  | Low  | High | Low  | Low  | Low  |
| Patterson et al, 2018                    | Low | High | Low  | High | High | Low  | Low  | Low  | Low  | High |
| Pinczewski et al, 2007                   | Low | High | Low  | High |

|                                              |     |      |     |      |      |      |      |      |      |      |
|----------------------------------------------|-----|------|-----|------|------|------|------|------|------|------|
| Wellsandt et al, 2018                        | Low | High | Low | High | High | High | High | Low  | High | High |
| <i>Studies not included in meta-analysis</i> |     |      |     |      |      |      |      |      |      |      |
| Flosadottir et al, 2016                      | Low | Low  | Low | High | Low  | Low  | Low  | Low  | Low  | High |
| Flosadottir et al, 2018                      | Low | Low  | Low | High | Low  | High | Low  | Low  | Low  | Low  |
| Kline et al, 2016                            | Low | High | Low | High |
