# Supplementary material
Source: HighWire-hosted journal article supplement (https://bjsm.bmj.com/content/57/13/855)
Supplement: inline-supplementary-material-7 [file inline-supplementary-material-7.pdf]

## Funnel plot with pseudo 95% confidence limits

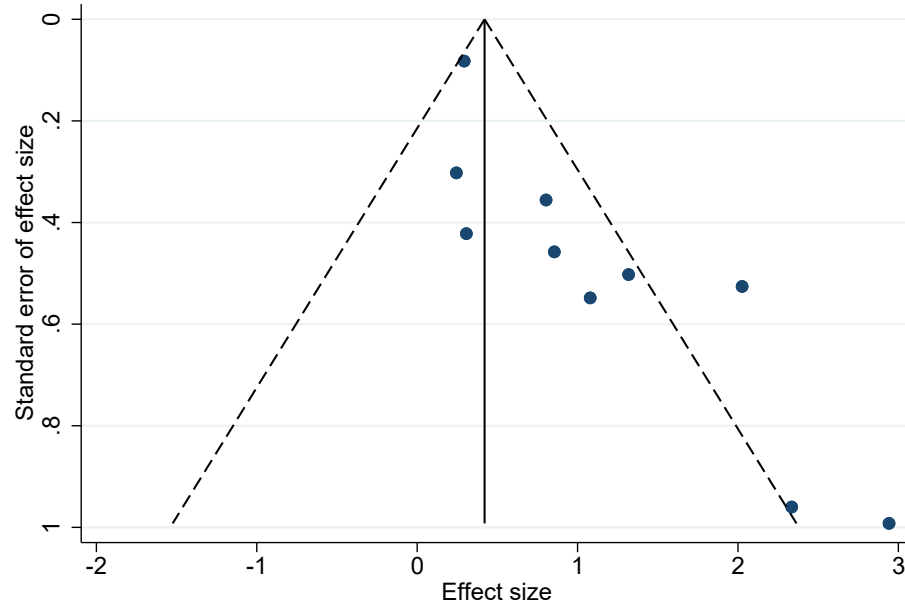

Number of studies = 10

Root MSE = 1.042

| Std_Eff | Coefficient | Std. err. | t    | P> t  | [95% conf. interval] |          |
|---------|-------------|-----------|------|-------|----------------------|----------|
| slope   | .095743     | .1061769  | 0.90 | 0.394 | -.1491014            | .3405874 |
| bias    | 2.014122    | .4626747  | 4.35 | 0.002 | .9471918             | 3.081052 |

Test of H0: no small-study effects

P = 0.002
