# Supplementary material
Source: HighWire-hosted journal article supplement (https://bjsm.bmj.com/content/57/13/855)
Supplement: inline-supplementary-material-10 [file inline-supplementary-material-10.pdf]

**Appendix 10.** Sensitivity analysis of repeated forward hop tests (i.e., crossover, triple, 6m-timed) - stratified meta-analysis

| Outcomes<br>(Individual hop test subgroup totals) | Odds<br>ratio (95%CI) | Study<br>(n) | Participants<br>(n) | Between hop test<br>heterogeneity<br>(I <sup>2</sup> & p-value) |
|---------------------------------------------------|-----------------------|--------------|---------------------|-----------------------------------------------------------------|
| <b>Return to sport</b>                            |                       |              |                     | I <sup>2</sup> = 71.8%<br>p=0.645                               |
| Crossover                                         | 1.77 (1.05, 2.96)     | 7            | 781                 |                                                                 |
| Triple                                            | 2.54 (1.09, 5.92)     | 6            | 443                 |                                                                 |
| 6m-timed                                          | 2.55 (1.2, 5.54)      | 6            | 529                 |                                                                 |
| <b>Self-reported symptoms and function</b>        |                       |              |                     | I <sup>2</sup> = 51.9%<br>p=0.978                               |
| Crossover                                         | 4.96 (1.55, 15.85)    | 3            | 228                 |                                                                 |
| Triple                                            | 4.48 (1.5, 13.33)     | 4            | 380                 |                                                                 |
| 6m-timed                                          | 5.2 (2.16, 12.53)     | 2            | 135                 |                                                                 |
| <b>Success with ACL deficiency</b>                |                       |              |                     | I <sup>2</sup> = 19.6%<br>p=0.843                               |
| Crossover                                         | 1.51 (0.94, 2.44)     | 5            | 437                 |                                                                 |
| Triple                                            | 1.27 (0.87, 1.86)     | 5            | 337                 |                                                                 |
| 6m-timed                                          | 1.43 (0.78, 2.63)     | 5            | 385                 |                                                                 |
| <b>Subsequent injury after ACL reconstruction</b> |                       |              |                     | I <sup>2</sup> = 1.2%<br>p=0.175                                |
| Crossover                                         | 1.03 (0.74, 1.44)     | 4            | 663                 |                                                                 |
| Triple                                            | 0.85 (0.47, 1.54)     | 3            | 334                 |                                                                 |
| 6m-timed                                          |                       | 2            | 176                 |                                                                 |
| <b>Knee osteoarthritis</b>                        |                       |              |                     | I <sup>2</sup> = 76.7%<br>p=0.014                               |
| Crossover                                         | 0.141 (0.05, 0.34)    | 1            | 78                  |                                                                 |
| Triple                                            | 0.737 (0.38, 1.42)    | 1            | 181                 |                                                                 |
| 6m-timed                                          | 0.584 (0.15, 2.27)    | 1            | 58                  |                                                                 |
