# Supplementary material
Source: HighWire-hosted journal article supplement (https://bjsm.bmj.com/content/57/13/855)
Supplement: inline-supplementary-material-16 [file inline-supplementary-material-16.pdf]

**Appendix 16.** Meta-regression results for studies reporting continuous hop scores and association to each outcome

Single-forward hop scores

| Outcome                                    | Coefficient (95%CI)   | P-value | Adjusted r <sup>2</sup> |
|--------------------------------------------|-----------------------|---------|-------------------------|
| <b>Follow-up time</b>                      |                       |         |                         |
| Return to sport                            | -0.01 (-0.07, 0.04)   | 0.63    | 20.74%                  |
| Self-reported symptoms and function        | -0.00 (-0.003, 0.001) | 0.22    | 3.79%                   |
| Success with ACL deficiency                | 0.00 (-0.003, 0.001)  | 0.90    | 52.48%                  |
| Subsequent injury after ACL reconstruction | -0.01 (-0.01, 0.01)   | 0.11    | 68.43%                  |
| Knee osteoarthritis                        | -0.00 (-0.006, 0.009) | 0.48    | 8.08%                   |
| <b>Proportion of females</b>               |                       |         |                         |
| Return to sport                            | -0.49 (-3.48, 2.48)   | 0.70    | 23.22%                  |
| Self-reported symptoms and function        | -0.84 (-5.12, 3.43)   | 0.66    | 23.97%                  |
| Success with ACL deficiency                | -1.63 (-6.09, 2.82)   | 0.39    | 9.15%                   |
| Subsequent injury after ACL reconstruction | -0.14 (-0.96, 0.67)   | 0.67    | 20.15%                  |
| Knee osteoarthritis                        | -2.14 (-26.73, 22.43) | 0.74    | 60.84%                  |

Repeated-forward hop scores

| Outcome                                    | Coefficient (95%CI)    | P-value | Adjusted r <sup>2</sup> |
|--------------------------------------------|------------------------|---------|-------------------------|
| <b>Follow-up time</b>                      |                        |         |                         |
| Return to sport                            | 0.00 (-0.08, 0.09)     | 0.90    | 28.73%                  |
| Self-reported symptoms and function        | 0.00 (-0.01, 0.005)    | 0.21    | 39.40%                  |
| Success with ACL deficiency                | 0.00 (-0.01, 0.02)     | 0.57    | -*                      |
| Subsequent injury after ACL reconstruction | 0.00 (-0.02, 0.01)     | 0.61    | -*                      |
| Knee osteoarthritis                        | 0.00 (-0.06, 0.07)     | 0.52    | 1.72%                   |
| <b>Proportion of females</b>               |                        |         |                         |
| Return to sport                            | -1.77 (-4.77, 1.21)    | 0.20    | 15.36%                  |
| Self-reported symptoms and function        | -6.73 (-26.14, 12.68)  | 0.35    | 2.81%                   |
| Success with ACL deficiency                | -2.89 (-7.33, 1.53)    | 0.13    | -*                      |
| Subsequent injury after ACL reconstruction | 0.21 (-2.22, 2.65)     | 0.74    | -*                      |
| Knee osteoarthritis                        | 3.93 (-170.94, 178.81) | 0.82    | 95.31%                  |

ACL, anterior cruciate ligament

\*Indicates values that were not able to be calculated
